# Supplementary material for: PGC-1α activator ZLN005 promotes maturation of cardiomyocytes derived from human embryonic stem cells
Source: publisher site journal article supplement (doi:10.18632/aging.103088), 2020-04-28
Supplement: Supplementary file [file aging-v12i8-103088-supplementary-material-SD1.pdf]

SUPPLEMENTARY FIGURE

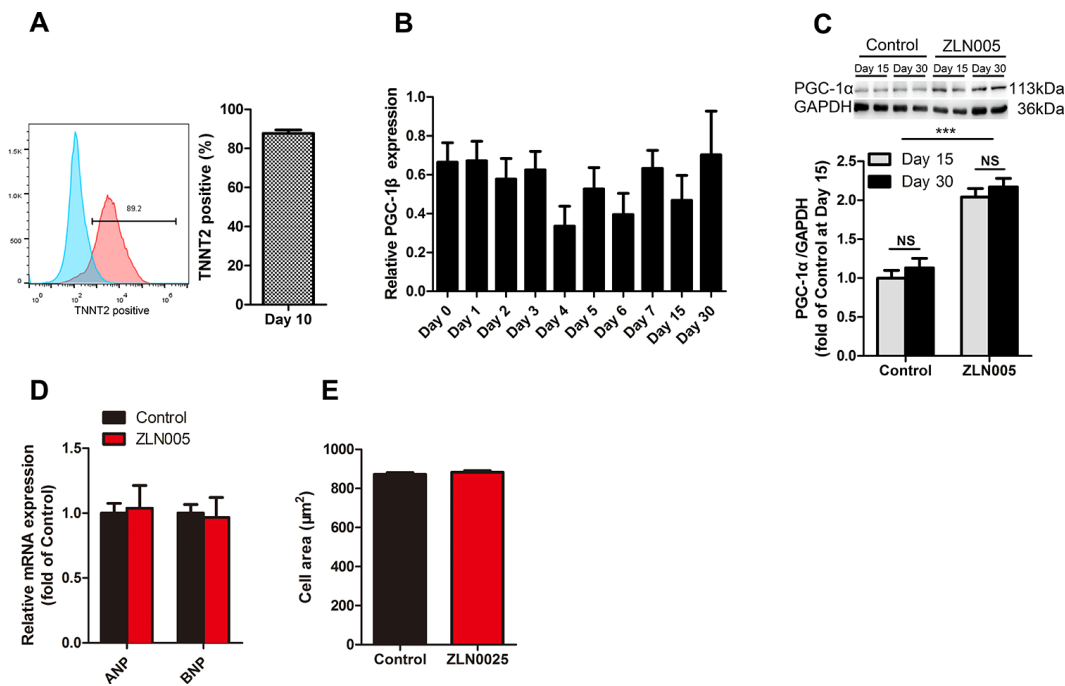

**Supplementary Figure 1.** (A) Cardiac differentiation efficiency measured by flow cytometry for cardiac troponin T (TNNT2) on day 10 cells (n=5). (B) The relative mRNA expression of PGC-1β during cardiomyocyte differentiation (n=7). (C) Effect of ZLN005 on PGC-1α protein expression (n=4). (D) qRT-PCR analysis of cardiac hypertrophy marker genes in hESC-CMs (n=7). (E) The cell area was not significantly changed in ZLN005-treated hESC-CMs (n=20-60 cells per condition).
